# Supplementary material
Source: publisher figshare collection journal article supplement (https://tandf.figshare.com/ndownloader/files/18128849)
Supplement: Supplementary file 1 [file 18128849]

**Table S1** List of native plant species, number of plots in which they were found, density of plants per square meter, and mean diameter found in thirty plots in an area of woodland Cerrado x

| **Family** | **Species** | **Number of plots in which the species was present** | **Number of plants sampled** | **Species trunk diameter at base ± SD** |
| --- | --- | --- | --- | --- |
| Anacardiaceae | *Anacardium occidentale* | 2 | 3 | 7.6±3.12 |
|  | *Tapirira guianensis* | 3 | 3 | 1.57±1.14 |
| Annonaceae | *Annona coriacea* | 4 | 8 | 13.4±7.22 |
|  | *Annona crassiflora* | 2 | 6 | 5.48±1.62 |
|  | *Cardiopetalum calophyllum* | 1 | 5 | 2.8±0.27 |
|  | *Guatteria sellowiana* | 6 | 4 | 2.98±0.14 |
|  | *Xylopia aromatica* | 2 | 4 | 3.38±0.14 |
|  | *Xylopia sericea* | 27 | 251 | 2.66±0.37 |
| Apocynaceae | *Aspidormerma tomentosum* | 23 | 91 | 4.45±0.9 |
|  | *Aspidosperma macrocarpon* | 9 | 18 | 6.25±2.17 |
|  | *Aspidosperma subincanum* | 7 | 21 | 5.39±1.56 |
|  | *Hancornia speciosa* | 2 | 20 | 7.4±2.98 |
| Aquifoliaceae | *Ilex affinis* | 8 | 1 | 2.78±0.29 |
| Araliaceae | *Schefflera macrocarpa* | 20 | 1 | 8.45±3.72 |
| Asteraceae | *Eremanthus glomerulatus* | 5 | 6 | 5.69±1.77 |
|  | *Piotocarpha rotundifolia* | 4 | 229 | 7.56±3.09 |
| Bignoniaceae | *Cybistax antisyphilitica* | 2 | 3 | 15.65±8.82 |
|  | *Cybistax sp.* | 1 | 2 | 10.8±5.39 |
|  | *Handroanthus ochraceus* | 7 | 4 | 5.45±1.6 |
|  | *Handroanthus serratifolius* | 2 | 15 | 14.3±7.86 |
|  | *Jacaranda puberula* | 12 | 24 | 3.21±0.02 |
|  | *Tabebuia aurea* | 1 | 1 | 1.3±1.33 |
|  | *Zeyheria montana* | 5 | 6 | 6.25±2.17 |
| Burseraceae | *Protium spruceanum* | 24 | 1 | 2.7±0.34 |
| Calophyllaceae | *Kilmeyera coriacea* | 15 | 19 | 5.8±1.85 |
|  | *Kilmeyera speciosa* | 18 | 53 | 5.33±1.52 |
| Caryocaraceae | *Caryocar brasiliense* | 14 | 33 | 7.77±3.24 |
| Celastraceae | *Maytenus floribunda* | 6 | 5 | 5.59±1.7 |
|  | *Plenckia populnea* | 5 | 59 | 2.58±0.43 |
|  | *Salacia crassifolia* | 11 | 20 | 5.71±1.79 |
| Chrysobalanaceae | *Couepia grandiflora* | 4 | 57 | 6.85±2.59 |
| Combretaceae | *Terminalia fagifolia* | 14 | 78 | 6.91±2.64 |
| Connaraceae | *Connarus suberosus* | 14 | 3 | 4.79±1.14 |
|  | *Rourea induta* | 1 | 4 | 5.1±1.36 |
| Dichapetalaceae | *Tapura amazonica* | 27 | 323 | 4.98±1.27 |
| Dilleniaceae | *Davilla elliptica* | 1 | 93 | 3.8±0.44 |
| Ebenaceae | *Diospyros hispida* | 4 | 17 | 6.89±2.62 |
| Erythroxylaceae | *Erythroxylum deciduum* | 4 | 16 | 5.64±1.74 |
| Euphorbiaceae | *Maprounea guianensis* | 18 | 18 | 3.43±0.17 |
| Fabaceae | *Dalbergia densiflora* | 2 | 1 | 7.64±3.15 |
|  | *Enterolobium gummiferum* | 5 | 148 | 6.43±2.3 |
|  | *Andira vermifuga* | 3 | 4 | 6.58±2.4 |
|  | *Bauhinia rufa* | 1 | 1 | 1.4±1.26 |
|  | *Bowdichia virgilioides* | 6 | 29 | 14.47±7.98 |
|  | *Chamaecrista orbiculata* | 3 | 2 | 3.23±0.03 |
|  | *Copaifera langsdorffii* | 8 | 27 | 4.58±0.99 |
|  | *Dalbergia miscolobium* | 21 | 9 | 12.24±6.4 |
|  | *Dimorphandra mollis* | 11 | 1 | 5.66±1.75 |
|  | *Hymenae stigonocarpa* | 16 | 2 | 5.78±1.84 |
|  | *Hymenolobium heringerianum* | 1 | 43 | 8.6±3.83 |
|  | *Leptolobium dasycarpum* | 19 | 2 | 5.09±1.35 |
|  | *Machaerium acutifolium* | 1 | 72 | 2.24±0.67 |
|  | *Machaerium hirtum* | 1 | 5 | 11.5±5.88 |
|  | *Machaerium opacum* | 10 | 20 | 3.62±0.31 |
|  | *Plathymenia reticulada* | 1 | 11 | 6.7±2.49 |
|  | *Tachiagali subvenlutina* | 1 | 1 | 22.3±13.52 |
|  | *Tachigali aurea* | 1 | 1 | 4.6±1 |
|  | *Vatairea macrocarpa* | 1 | 4 | 6.58±2.4 |
| Hypericaceae | *Vismia guianensis* | 1 | 2 | 9.85±4.71 |
| Icacinaceae | *Emmotum nitens* | 17 | 16 | 7.53±3.07 |
| Lamiaceae | *Aegiphila lhotskiana* | 5 | 6 | 2.28±0.64 |
|  | *Aegiphylla sellowiana* | 4 | 12 | 13.47±7.27 |
| Lauraceae | *Nectandra cissiflora* | 1 | 49 | 3.2±0.01 |
|  | *Neea theifera* | 1 | 1 | 5.01±1.29 |
|  | *Ocotea spixiana* | 15 | 1 | 2.5±0.48 |
|  | *Ocotea corymbosa* | 7 | 6 | 6.21±2.14 |
| Lecythidaceae | *Eschweilera nana* | 1 | 8 | 3.8±0.44 |
| Loganiaceae | *Strychnos pseudoquina* | 8 | 9 | 5.86±1.89 |
| Lythraceae | *Lafoesia pacari* | 1 | 61 | 9.55±4.5 |
| Magnoliaceae | *Magnolia ovata* | 1 | 1 | 4.18±0.7 |
| Malpighiaceae | *Byrsonima coccolobifolia* | 6 | 7 | 6.8±2.56 |
|  | *Byrsonima laxiflora* | 5 | 10 | 3.07±0.08 |
|  | *Byrsonima pachyphylla* | 15 | 37 | 5.11±1.36 |
| Malvaceae | *Eriotheca pubescens* | 7 | 9 | 8.4±3.69 |
| Marcgraviaceae | *Morantea adamantium* | 1 | 1 | 2.5±0.48 |
|  | *Norantea adamantium* | 1 | 24 | 6±1.99 |
| Melastomataceae | *Miconia burchellii* | 26 | 83 | 6.53±2.37 |
|  | *Miconia cuspida* | 21 | 31 | 4.28±0.78 |
|  | *Miconia dodecandra* | 24 | 140 | 4.06±0.62 |
|  | *Miconia ferruginata* | 13 | 129 | 5.17±1.4 |
|  | *Miconia leucoparpa* | 2 | 272 | 2.48±0.5 |
|  | *Miconia sellowiana* | 1 | 84 | 4.1±0.65 |
|  | *Miconia sp.* | 1 | 18 | 2.3±0.62 |
| Moraceae | *Brosimum gaudichaudii* | 18 | 61 | 3.77±0.41 |
| Myristicaceae | *Virola sebifera* | 7 | 70 | 5.24±1.45 |
|  | *Virola urbaniana* | 1 | 1 | 1.6±1.12 |
| Myrsinaceae | *Rapanea ferruginea* | 1 | 108 | 5.4±1.57 |
|  | *Rapanea parviflora* | 8 | 256 | 4.64±1.03 |
| Myrtaceae | *Blepharocalyx salicifolius* | 30 | 424 | 5.97±1.97 |
|  | *Campomanesia velutina* | 1 | 1 | 5.4±1.57 |
|  | *Eugenia dysenterica* | 9 | 1 | 5.86±1.89 |
|  | *Eugenia florida* | 4 | 39 | 3.13±0.04 |
|  | *Gomidesia lindeniana* | 6 | 1 | 3.26±0.05 |
|  | *Gomidesia sp.* | 1 | 15 | 3.5±0.22 |
|  | *Myrcia laruotteana* | 4 | 2 | 6.2±2.13 |
|  | *Myrcia magnoliifolia* | 1 | 2 | 1.1±1.47 |
|  | *Myrcia sp.* | 1 | 6 | 2.9±0.2 |
|  | *Myrcia tomentosa* | 8 | 1 | 2.32±0.61 |
|  | *Psidium laruotteanum* | 6 | 6 | 5.95±1.96 |
|  | *Psidium myrsinites* | 1 | 2 | 1.82±0.96 |
|  | *Siphoneugena densiflora* | 18 | 1 | 3.76±0.41 |
| Nyctaginacae | *Guapira graciflilora* | 24 | 1 | 4.48±0.92 |
|  | *Guapira noxia* | 20 | 140 | 7.55±3.09 |
|  | *Guapira sp.* | 2 | 45 | 4.45±0.9 |
|  | *Norantea guianensis* | 1 | 1 | 4.87±1.19 |
| Ochnaceae | *Ouratea castaneifolia* | 2 | 7 | 3.47±0.2 |
|  | *Ouratea hexasperma* | 28 | 39 | 5.63±1.73 |
| Opiliaceae | *Agonandra brasiliensis* | 1 | 2 | 7.35±2.95 |
| Peraceae | *Pera glabrata* | 14 | 9 | 2.37±0.58 |
| Phyllanthaceae | *Richeria grandis* | 1 | 30 | 5.4±1.57 |
| Proteacea | *Roupala montana* | 23 | 18 | 6.22±2.15 |
| Rubiaceae | *Cordiera macrophylla* | 12 | 30 | 3.84±0.46 |
|  | *Coussarea hydrandeifolia* | 1 | 9 | 10±4.82 |
|  | *Faramea cyanea* | 1 | 41 | 1.8±0.98 |
|  | *Palicourea rigida* | 9 | 86 | 5.08±1.34 |
| Rutaceae | *Zanthoxylum rhoifolium* | 4 | 5 | 2.78±0.29 |
| Salicaceae | *Casearia sylvestris* | 2 | 1 | 2.3±0.62 |
|  | *Caseria grandiflora* | 1 | 2 | 8.5±3.76 |
| Sapotacea | *Chrysiphyllum marginatum* | 2 | 3 | 2.83±0.25 |
|  | *Pouteria ramiflora* | 2 | 9 | 3.13±0.04 |
| Siparunaceae | *Siparuna guianensis* | 1 | 95 | 2.73±0.32 |
| Solanaceae | *Solanum lycocarpum* | 2 | 22 | 1.9±0.91 |
| Styracaceae | *Styrax camporum* | 4 | 19 | 3.93±0.53 |
|  | *Styrax ferrugineus* | 11 | 53 | 2.61±0.41 |
|  | *Styrax oblongus* | 1 | 2 | 7.25±2.88 |
| Vochysiaceae | *Qualea dichotoma* | 4 | 252 | 7.43±3 |
|  | *Qualea grandiflora* | 23 | 3 | 8.3±3.62 |
|  | *Qualea multiflora* | 24 | 9 | 6.47±2.32 |
|  | *Qualea parviflora* | 9 | 5 | 7.58±3.11 |
|  | *Qualea* sp. | 3 | 4 | 3.78±0.42 |
|  | *Vochysia elliptica* | 1 | 1 | 5.3±1.5 |
|  | *Vochysia pyramidalis* | 2 | 9 | 3.02±0.12 |
|  | *Vochysia thyrsoidea* | 11 | 26 | 8.16±3.52 |
|  | *Vochysia tucanorum* | 3 | 17 | 3.4±0.15 |
